# Supplementary material for: Oxygen-powered flower-like FeMo6@CeO2 self-cascade nanozymes: a turn-on enhancement fluorescence sensor
Source: Royal Society of Chemistry journal article supplement (doi:10.1039/d2tb01466a), 2022-01-01
Supplement: d2tb01466a1.pdf [file d2tb01466a1.pdf]

## Electronic Supplementary Information

# Oxygen-Powered Flower-like FeMo<sub>6</sub>@CeO<sub>2</sub> Self-cascade Nanozyme: Turn-on Enhancement Fluorescence Sensor

Zhibo Tong,<sup>a</sup> Tong Wang,<sup>b</sup> Yunheng Cai,<sup>b</sup> Jingquan Sha<sup>\*b</sup>, Tai Peng<sup>\*a</sup>

<sup>a</sup> College of Materials Science and Engineering, Jiamusi University, HeilongJiang, Jiamusi, 154007, P.R. China

<sup>b</sup> School of Chemistry, Chemical Engineering and Materials, Jining University, Shandong, Qufu 273155, P. R. China

\*Corresponding author: E-mail address: pt@jmsu.edu.cn.

## Table of Contents

|                                     |    |
|-------------------------------------|----|
| Section 1. Supporting Figures ..... | 2  |
| Section 2. Supporting Tables.....   | 10 |
| Section 3. Supporting Schemes ..... | 12 |
| References .....                    | 13 |

## Section 1. Supporting Figures

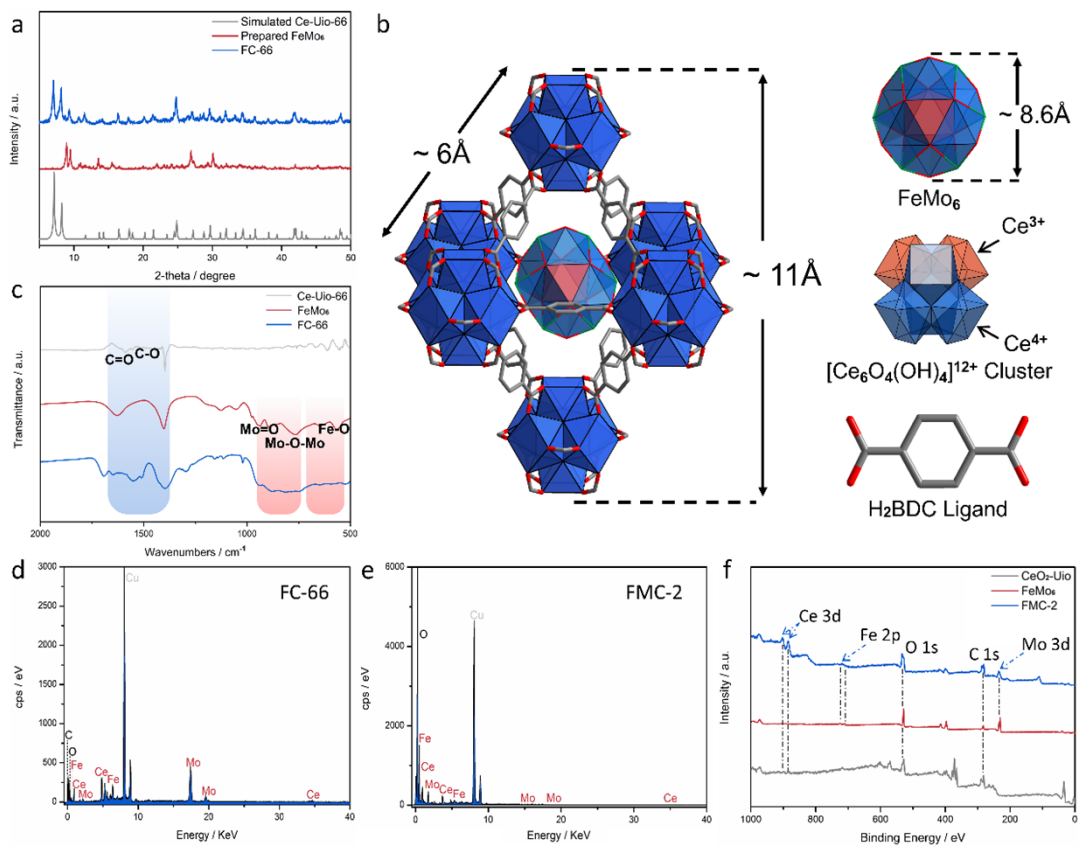

**Figure S1.** (a) XRD pattern observed for FC-66 in comparison with the prepared FeMo<sub>6</sub> as well as the simulated pattern of Ce-Uio-66; (b) combined wires/sticks/polyhedral representation of the asymmetric unit of FC-66; (c) the FT-IR spectra of Ce-Uio-66, FeMo<sub>6</sub> and FC-66; EDS spectrums of (d) FC-66 and (e) FMC-2; (f) full survey scan of XPS spectra for FMC-2, FeMo<sub>6</sub> and CeO<sub>2</sub>-Uio, respectively.

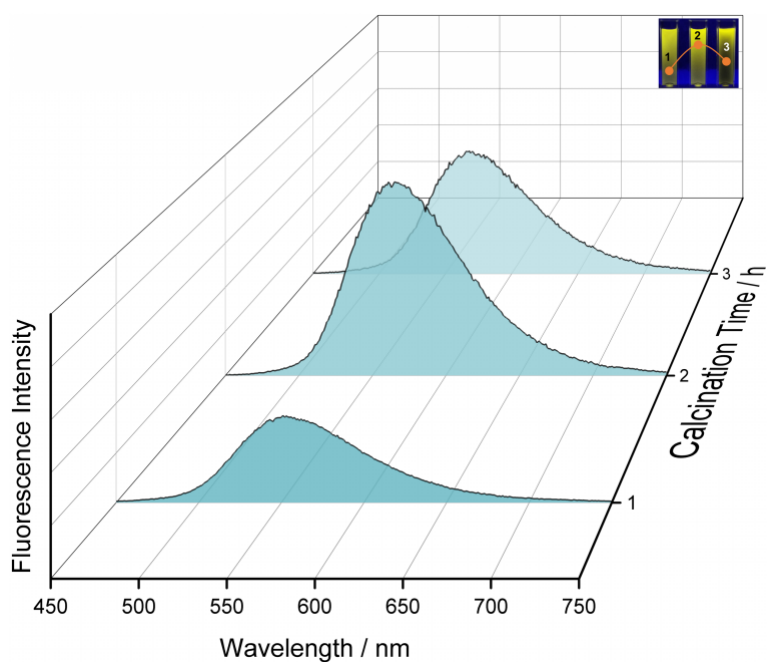

**Figure S2** Fluorescence curves and optical photographs of FMC-n.

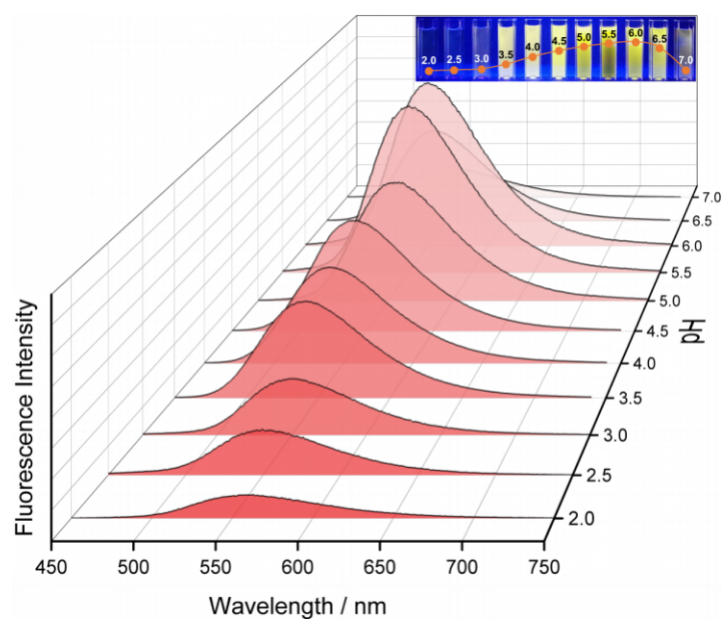

**Figure S3** Fluorescence curves and optical photos of FMC-2 under different pH.

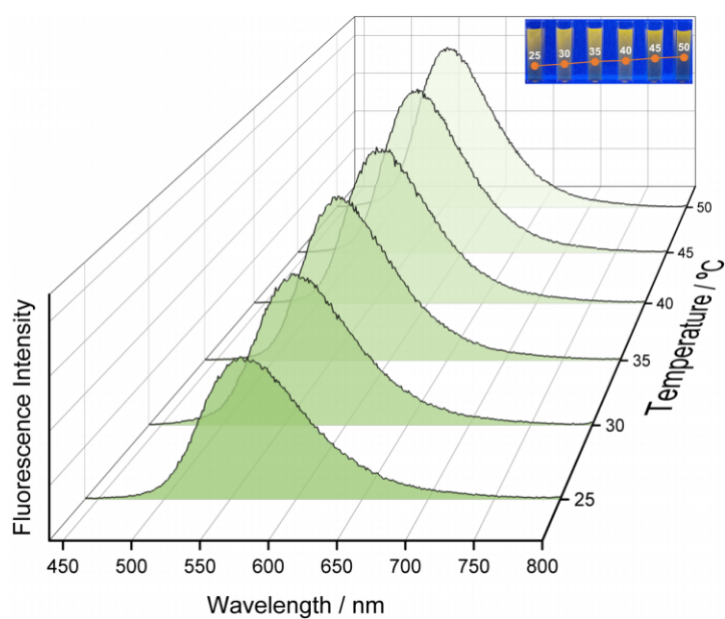

**Figure S4** Fluorescence curves and optical photos of FMC-2 under different temperatures.

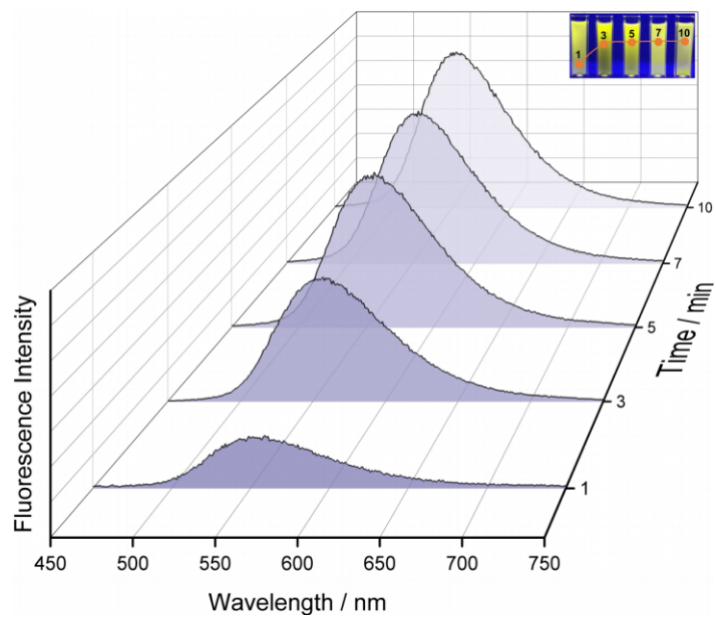

**Figure S5** Fluorescence curves and optical photos of FMC-2 under different reaction times.

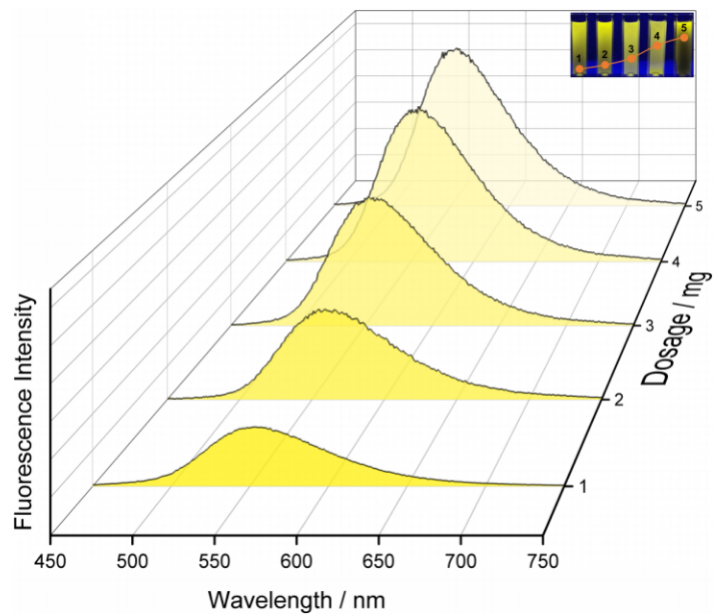

**Figure S6** Fluorescence curves and optical photos of FMC-2 with different feeding dosage.

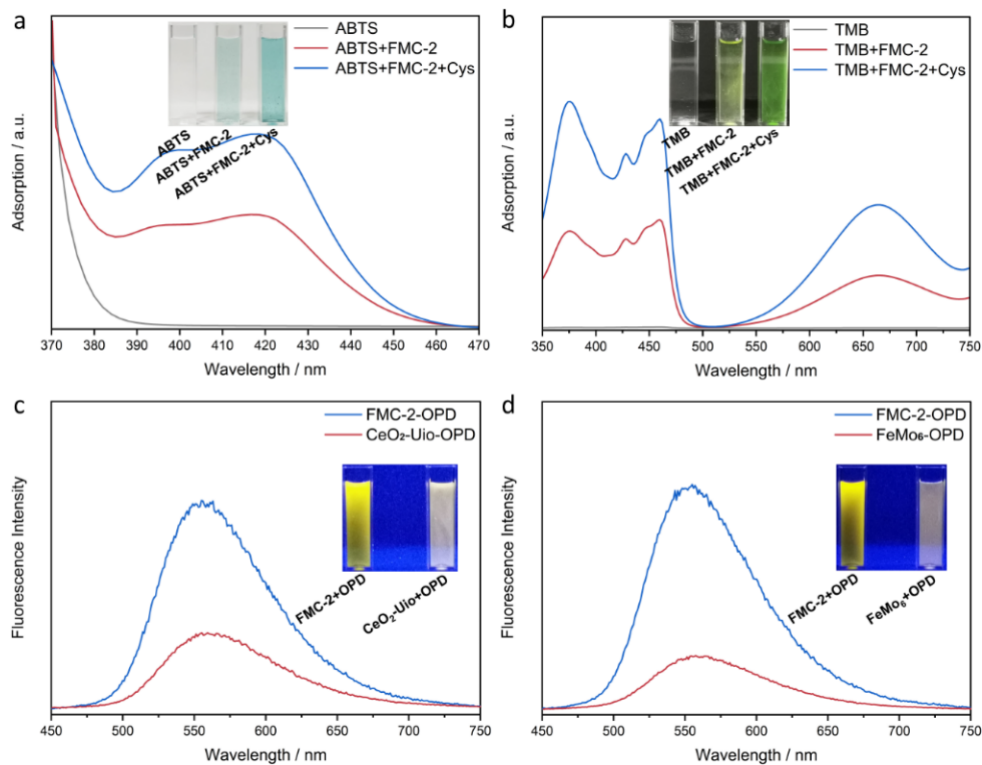

**Figure S7.** UV-vis spectra and the corresponding optical photographs of (a) ABTS, ABTS-FMC-2 and ABTS-FMC-2-Cys; (b) TMB, TMB-FMC-2 and TMB-FMC-2-Cys (pH=5.5, 5 min, 25 °C); fluorescence curves and corresponding optical photographs of (c) FMC-2-OPD and CeO<sub>2</sub>-Uio-OPD; (d) FMC-2-OPD-H<sub>2</sub>O<sub>2</sub> and FeMo<sub>6</sub>-OPD-H<sub>2</sub>O<sub>2</sub> (pH=5.5, 5 min, 25 °C).

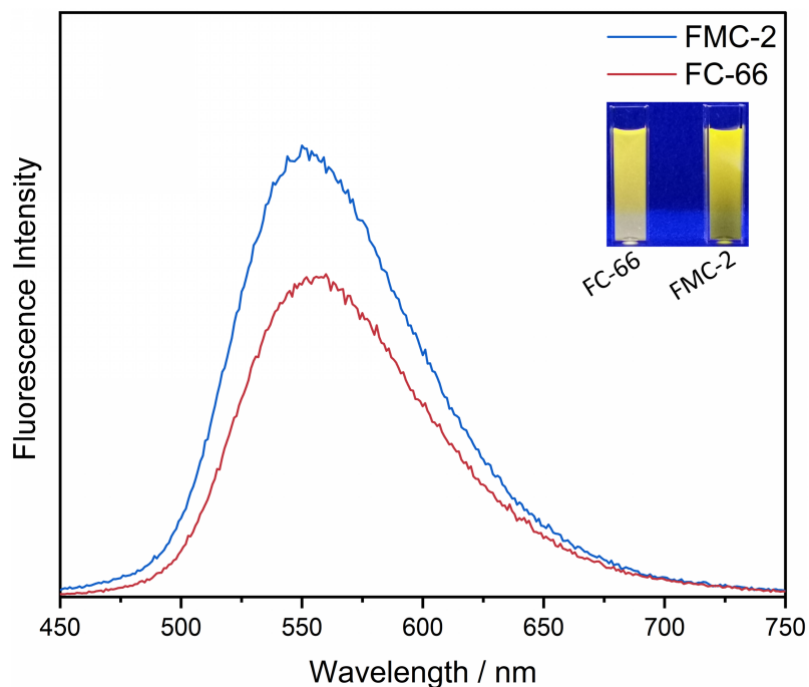

**Figure S8.** Fluorescence curves and corresponding optical photographs of FMC-2-OPD-O<sub>2</sub> and FC-66-OPD-O<sub>2</sub>.

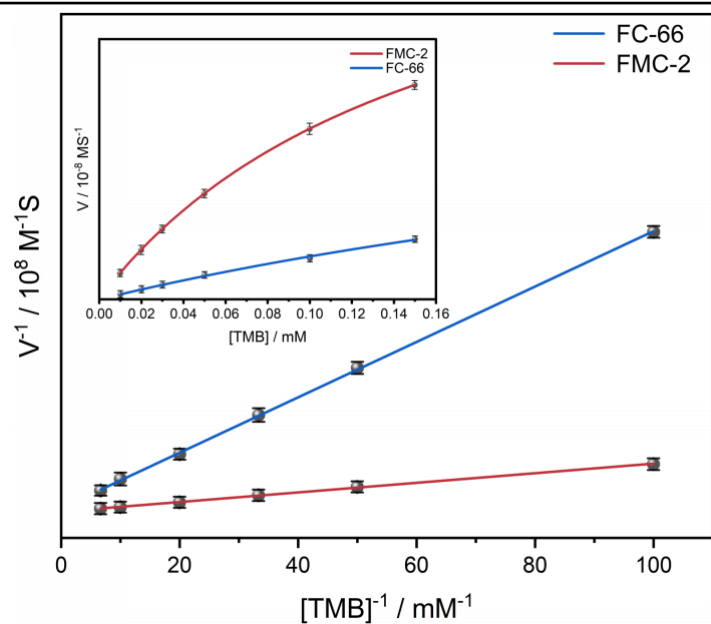

**Figure S9.** Steady-state kinetics curves of initial reaction rate ( $V$ ) against varying TMB concentration for FC-66 and FMC-2, Lineweaver-Burk plot of  $1/V$  against  $1/C_{\text{TMB}}$  for FC-66 and FMC-2.

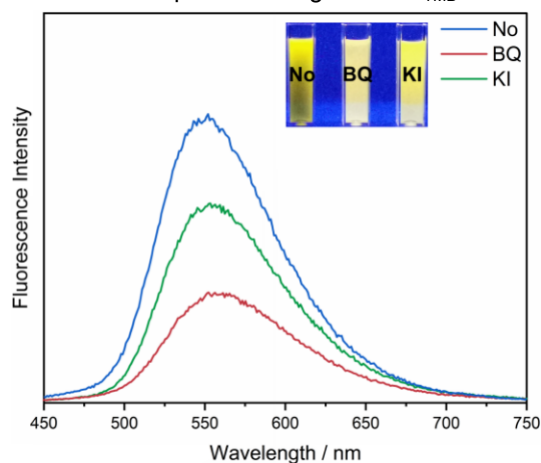

**Figure S10** Fluorescence curves and corresponding optical photographs of FMC-2-OPD- $\text{O}_2$  under the effect of 1 mM *p*-benzoquinone (BQ) and potassium iodide (KI) quencher-spiked agent.

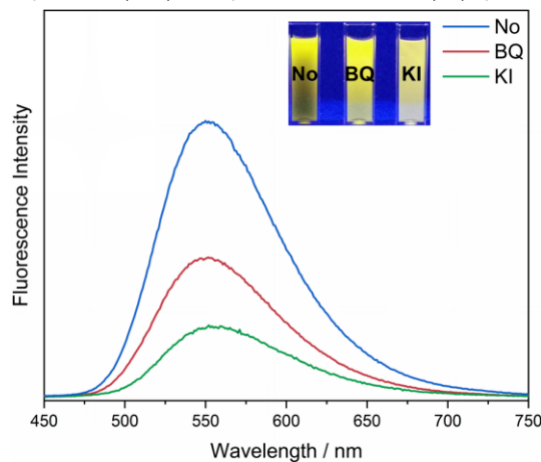

**Figure S11** Fluorescence curves and corresponding optical photographs of FMC-2-OPD- $\text{O}_2$ -Cys under the effect of 1 mM *p*-benzoquinone (BQ) and potassium iodide (KI) quencher-spiked agent.

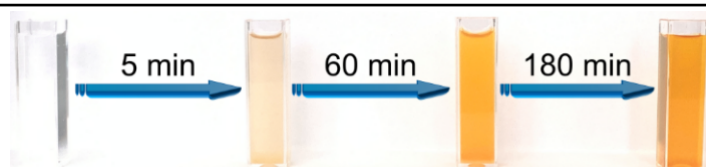

**Figure S12** Optical photographs of FMC-2-TiOSO<sub>4</sub> over time.

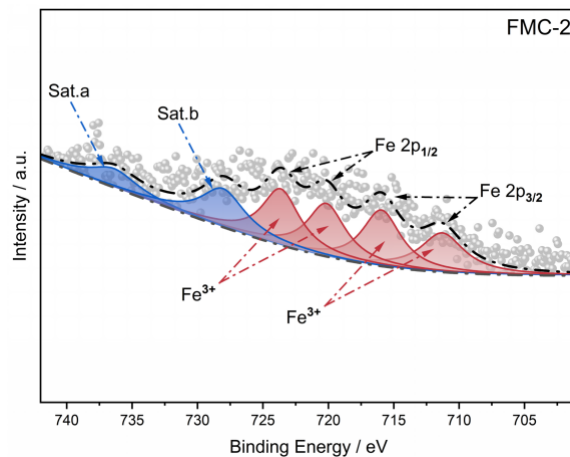

**Figure S13.** The high-resolution of Fe 2p XPS spectra for FMC-2.

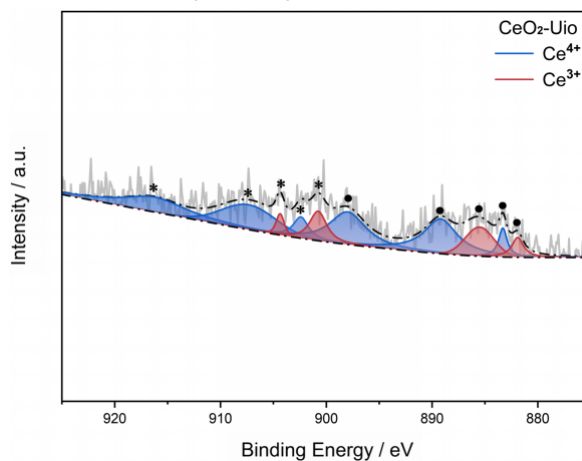

**Figure S14.** The high-resolution of Ce 3d XPS spectra for CeO<sub>2</sub>-Uio, the asterisks assigned to the spin-orbit split 3d<sub>3/2</sub> and circles for 3d<sub>5/2</sub>.

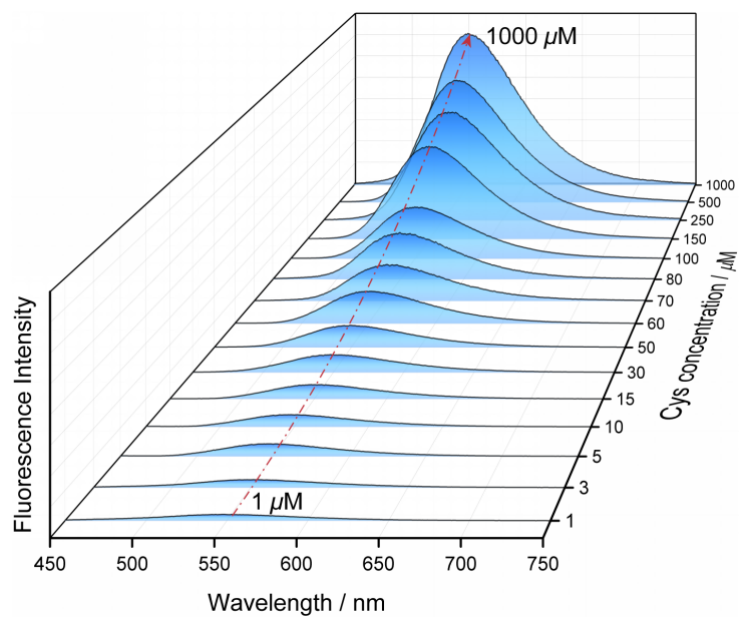

**Figure S15** Fluorescence curves of FMC-2 catalyzed oxidation of OPD under the enhancement of different concentrations of Cys.

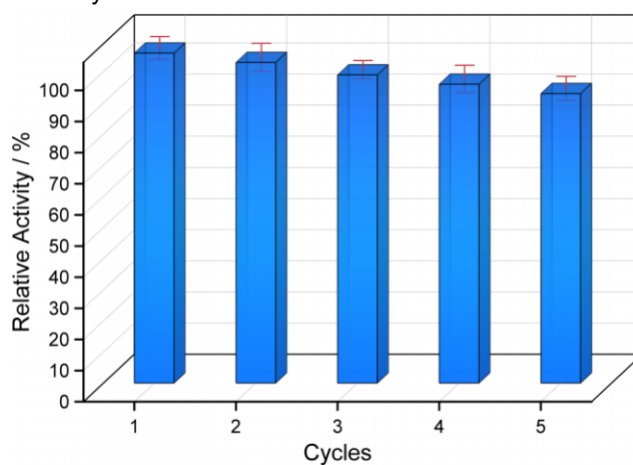

**Figure S16** The reproducibility of FMC-2 after repeated cycles.

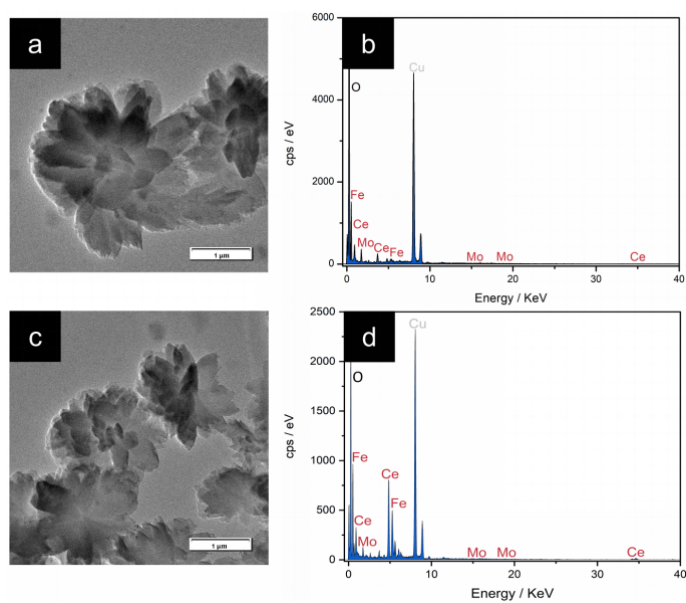



**Figure S17** (a) and (b) TEM image and EDS spectrum of FMC-2 before evaluation of self-cascading multienzyme mimic activity, respectively; (c) and (d) TEM image and EDS spectrum of FMC-2 after the reaction, respectively.

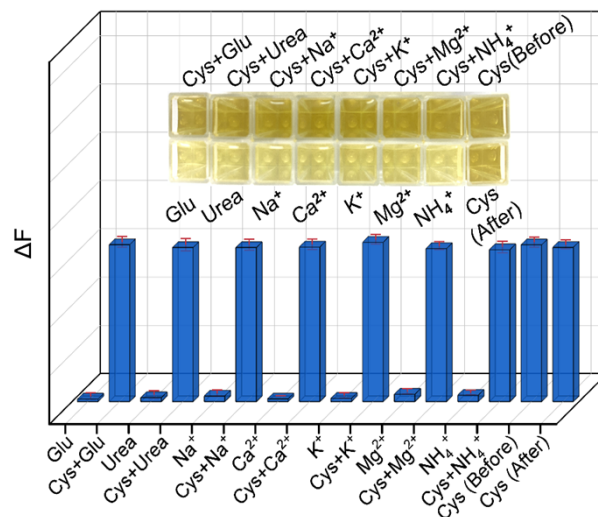

**Figure S18** Optical photographs and  $\Delta F$  of the developed self-cascading multienzyme sensing platform with different analytes. Analytes: 80  $\mu\text{M}$  of  $\text{K}^+$ ,  $\text{Na}^+$ ,  $\text{Mg}^{2+}$ ,  $\text{Ca}^{2+}$ ,  $\text{NH}_4^+$ , Glu and urea.

## Section 2. Supporting Tables

**Table S1.** Summary of Physicochemical Properties of FC-66 and FMC-n

| Sample | $S_{\text{BET}}$<br>( $\text{m}^2\cdot\text{g}^{-1}$ ) | Pore size<br>(nm) | Pore volume<br>( $\text{cm}^3\cdot\text{g}^{-1}$ ) |
|--------|--------------------------------------------------------|-------------------|----------------------------------------------------|
| FC-66  | 11.61                                                  | 9.59              | 0.0508                                             |
| FMC-1  | 16.12                                                  | 12.41             | 0.0527                                             |
| FMC-2  | 35.06                                                  | 12.10             | 0.2296                                             |
| FMC-3  | 38.86                                                  | 18.45             | 0.2345                                             |

**Table S2.** Ce  $3d_{3/2}$  and Ce  $3d_{5/2}$  components in XPS spectra of FMC-2.

| Ionic state | Spin-orbit doublet | Components       | BE<br>( $\pm 0.1$ eV) | FWHM<br>( $\pm 0.1$ eV) | Ce (III)<br>ratio (%) <sup>1</sup> |
|-------------|--------------------|------------------|-----------------------|-------------------------|------------------------------------|
| Ce(IV)      | $3d_{3/2}$         | U                | 906.32                | 2.88                    | 34 %                               |
|             |                    | U <sup>II</sup>  | 910.78                | 4.69                    |                                    |
|             |                    | U <sup>III</sup> | 918.43                | 8.87                    |                                    |
|             | $3d_{5/2}$         | V                | 887.25                | 3.19                    |                                    |
|             |                    | V <sup>II</sup>  | 892.07                | 4.79                    |                                    |
|             |                    | V <sup>III</sup> | 901.09                | 6.60                    |                                    |
| Ce(III)     | $3d_{3/2}$         | U <sup>0</sup>   | 903.94                | 3.08                    |                                    |
|             |                    | U <sup>I</sup>   | 908.31                | 2.88                    |                                    |
|             | $3d_{5/2}$         | V <sup>0</sup>   | 884.67                | 4.25                    |                                    |
|             |                    | V <sup>I</sup>   | 889.83                | 2.91                    |                                    |

**Table S3.** Ce  $3d_{3/2}$  and Ce  $3d_{5/2}$  components in XPS spectra of CeO<sub>2</sub>-Uio.

| Ionic state | Spin-orbit doublet | Components       | BE<br>( $\pm 0.1$ eV) | FWHM<br>( $\pm 0.1$ eV) | Ce (III)<br>ratio (%) <sup>1</sup> |
|-------------|--------------------|------------------|-----------------------|-------------------------|------------------------------------|
| Ce(IV)      | $3d_{3/2}$         | U                | 901.94                | 2.47                    | 29 %                               |
|             |                    | U <sup>II</sup>  | 908.09                | 3.42                    |                                    |
|             |                    | U <sup>III</sup> | 917.06                | 3.53                    |                                    |
|             | $3d_{5/2}$         | V                | 883.68                | 1.91                    |                                    |
|             |                    | V <sup>II</sup>  | 889.26                | 2.77                    |                                    |
|             |                    | V <sup>III</sup> | 897.71                | 2.68                    |                                    |
| Ce(III)     | $3d_{3/2}$         | U <sup>0</sup>   | 900.38                | 2.32                    |                                    |
|             |                    | U <sup>I</sup>   | 904.56                | 2.44                    |                                    |
|             | $3d_{5/2}$         | V <sup>0</sup>   | 881.94                | 1.78                    |                                    |
|             |                    | V <sup>I</sup>   | 886.13                | 2.36                    |                                    |

**Table S4.** Recoveries of the determination of Cys in human urine samples using the proposed self-cascading multienzyme sensing platform.

| Sample | Added ( $\mu\text{M}$ ) | Measured ( $\mu\text{M}$ ) | Recovery (%) | RSD (% , n=3) |
|--------|-------------------------|----------------------------|--------------|---------------|
|        | 0                       | $9.97 \pm 0.19$            | –            | –             |
| 1      | 20                      | $29.64 \pm 0.13$           | 98.2         | 1.92          |
|        | 40                      | $51.28 \pm 0.18$           | 102.6        | 2.03          |
|        | 0                       | $11.64 \pm 0.16$           | –            | –             |
| 2      | 20                      | $30.96 \pm 0.15$           | 103.2        | 2.01          |
|        | 40                      | $50.56 \pm 0.18$           | 101.4        | 2.14          |

### Section 3. Supporting Schemes

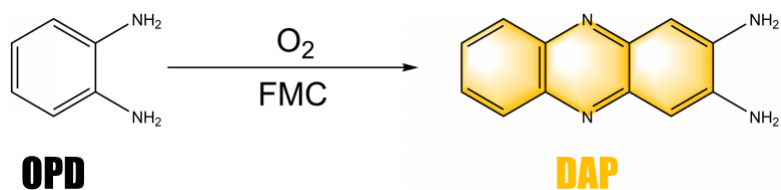

**Scheme S1.** Catalytic oxidation of OPD by flower-like FMC-3 in the presence of O<sub>2</sub>.

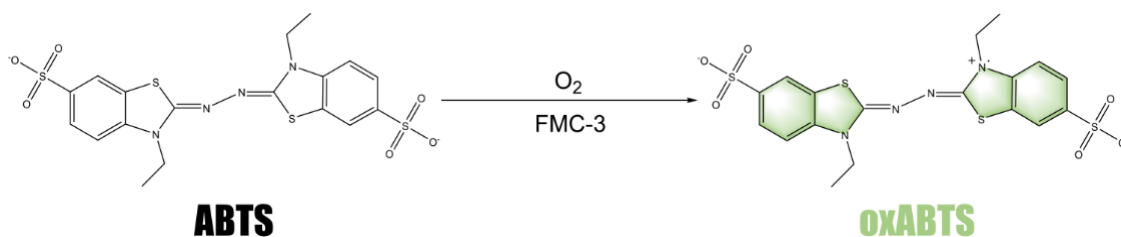

**Scheme S2.** Catalytic oxidation of ABTS by flower-like FMC-3 in the presence of O<sub>2</sub>.

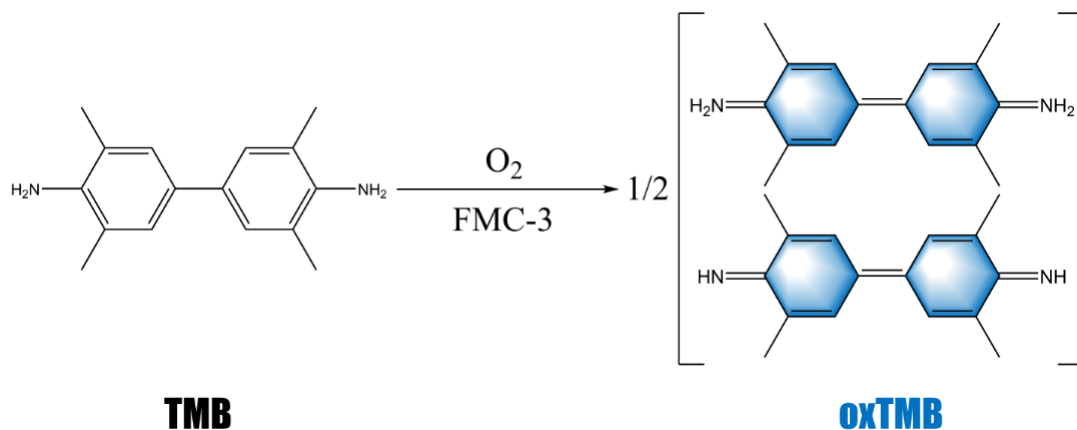

**Scheme S3.** Catalytic oxidation of TMB by flower-like FMC-3 in the presence of O<sub>2</sub>.

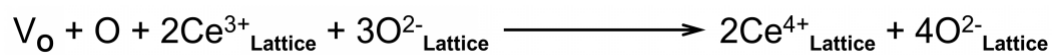

**Scheme S4.** The oxygen vacancy (V<sub>o</sub>) action maintains the surface charge of FMC.

---

## References

- (1) Beche E, Peraudeau G, Flaud V, et al. An XPS investigation of  $(\text{La}_2\text{O}_3)_{1-x}(\text{CeO}_2)_x$  compounds[J]. Surface and interface analysis, 2012, 44(8): 1045-1050.
